# Supplementary material for: Lipodystrophy in methylmalonic acidemia associated with elevated FGF21 and abnormal methylmalonylation
Source: PubMed Central journal article supplement (PMC10967474; doi:10.1172/jci.insight.174097), 2024-02-22

For Figure 5 C (most blots were cut prior to staining in order to stain for multiple proteins) :

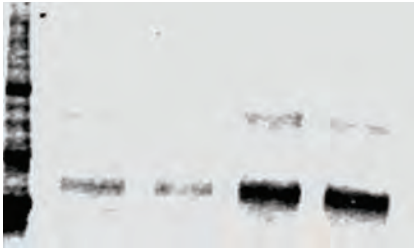

SIRT1

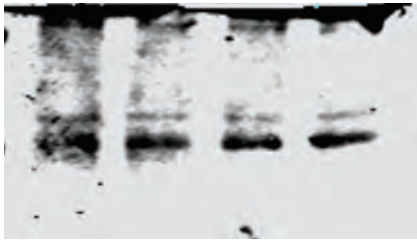

DIO2

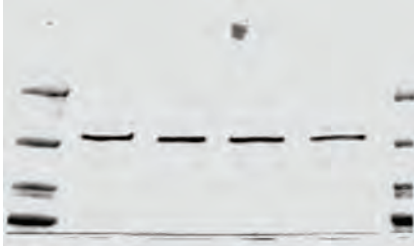

PGC-1α

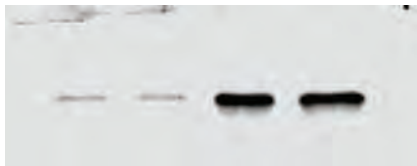

FGF21

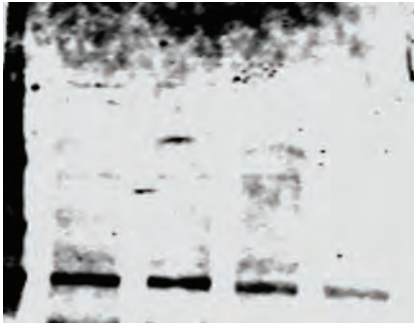

MFN2

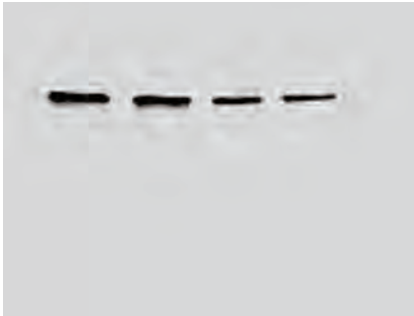

β-actin

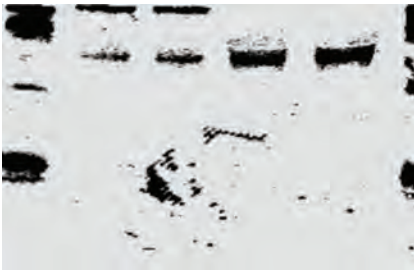

UCP1

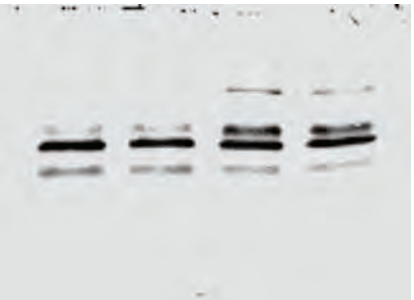

SIRT5

For Figure 5 F (most blots were cut prior to staining in order to stain for multiple proteins) :

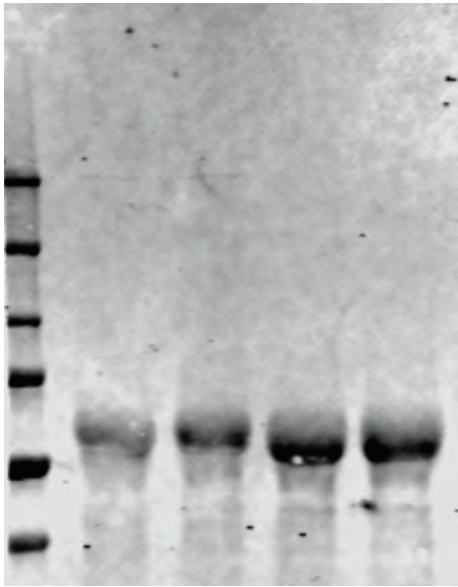

Acetylation

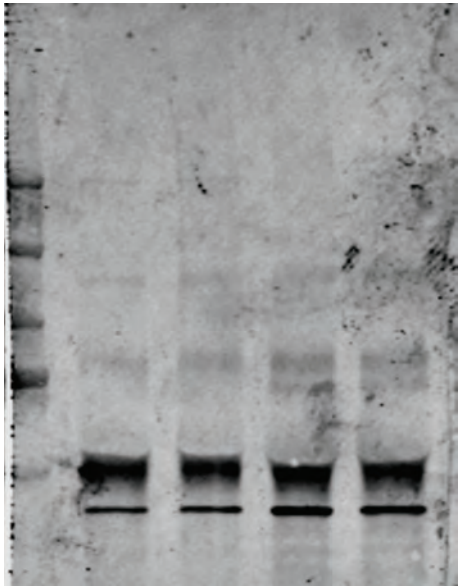

Succinylation

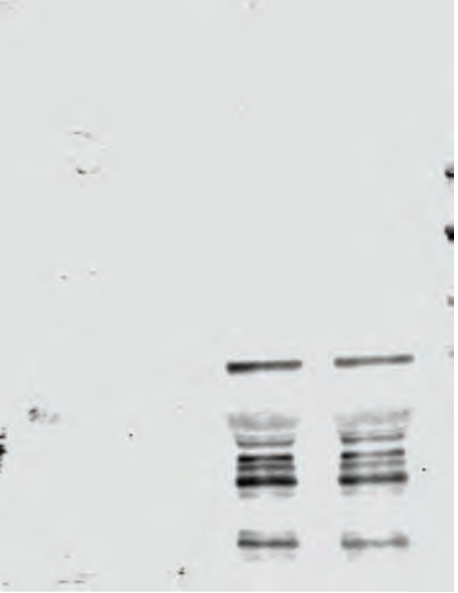

Methyalmalonylation

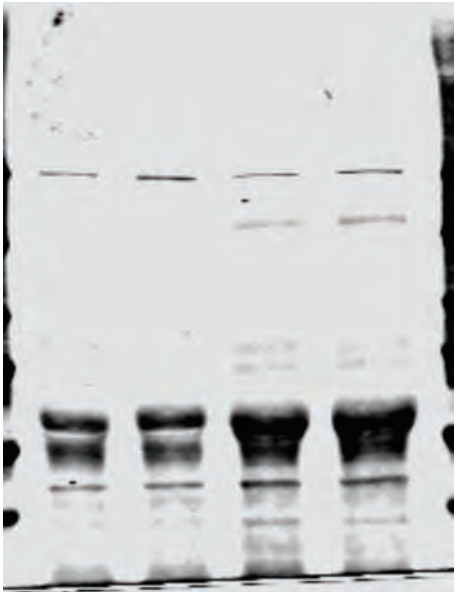

Propionylation

**For Supplemental Figure 5 A  
(most blots were cut prior to staining in order to stain for multiple proteins) :**

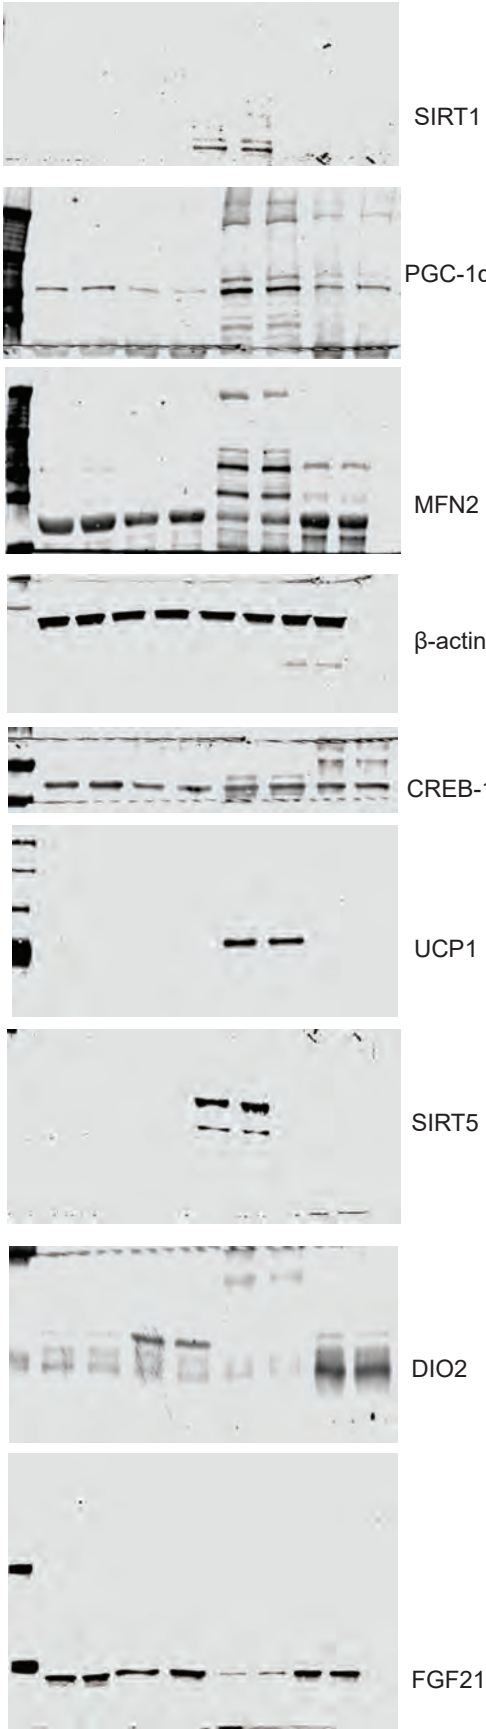

**For Supplemental Figure 5 B  
(most blots were cut prior to staining in order to stain for multiple proteins) :**

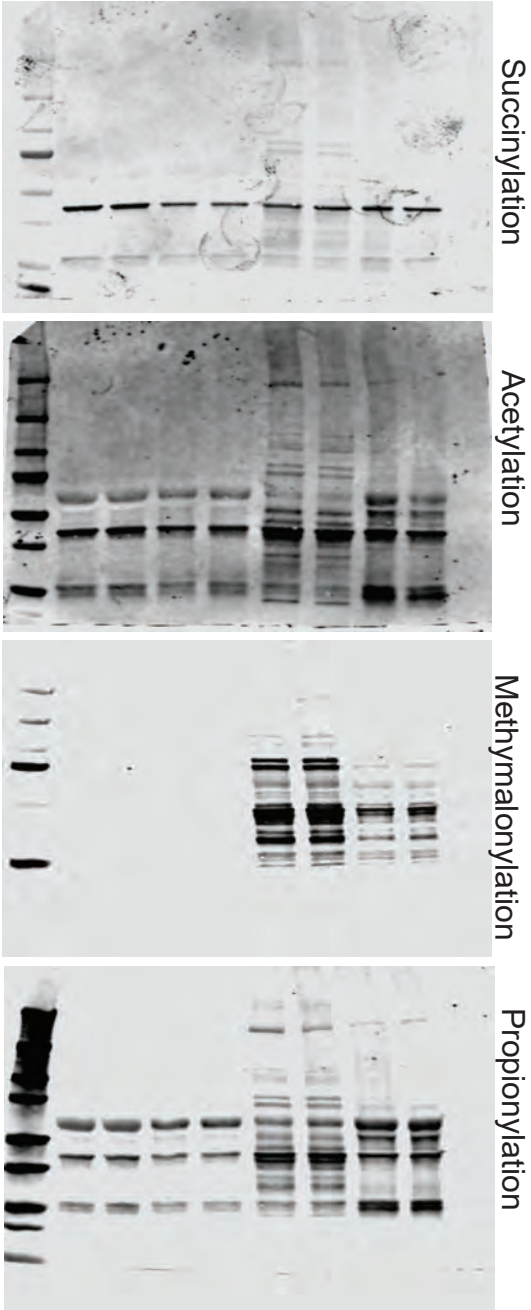

**For Supplemental Figure 5 C  
(most blots were cut prior to  
staining in order to stain for  
multiple proteins) :**

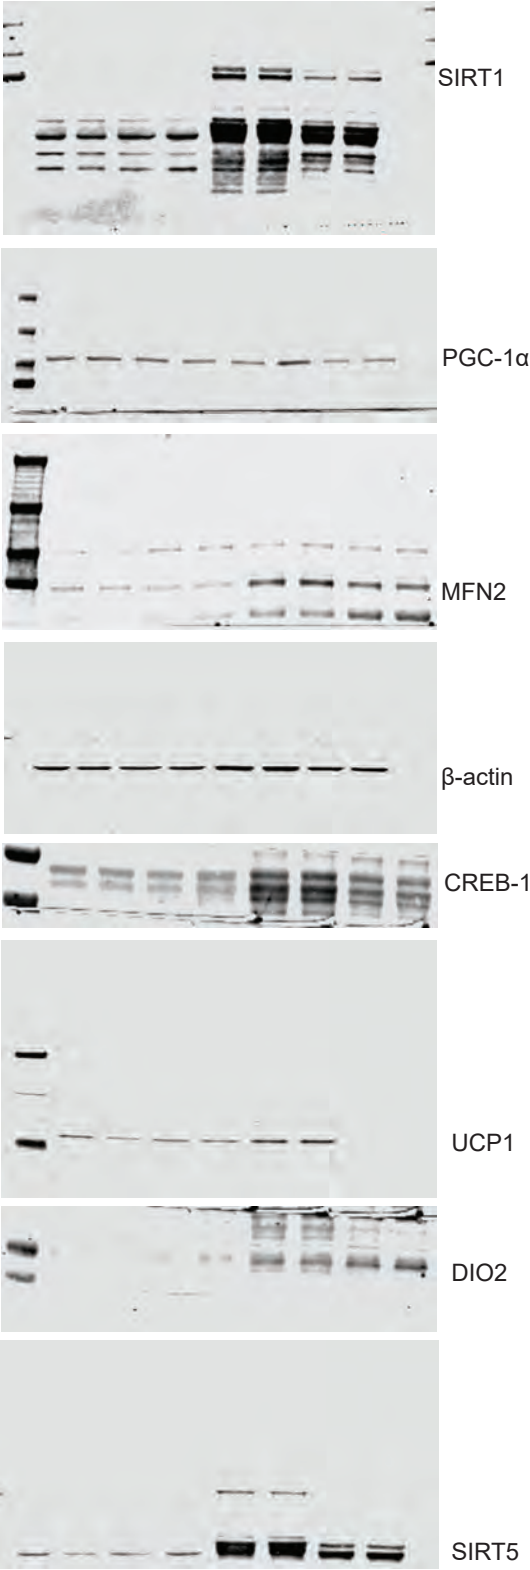

**For Supplemental Figure 5 D  
(most blots were cut prior to  
staining in order to stain for  
multiple proteins) :**

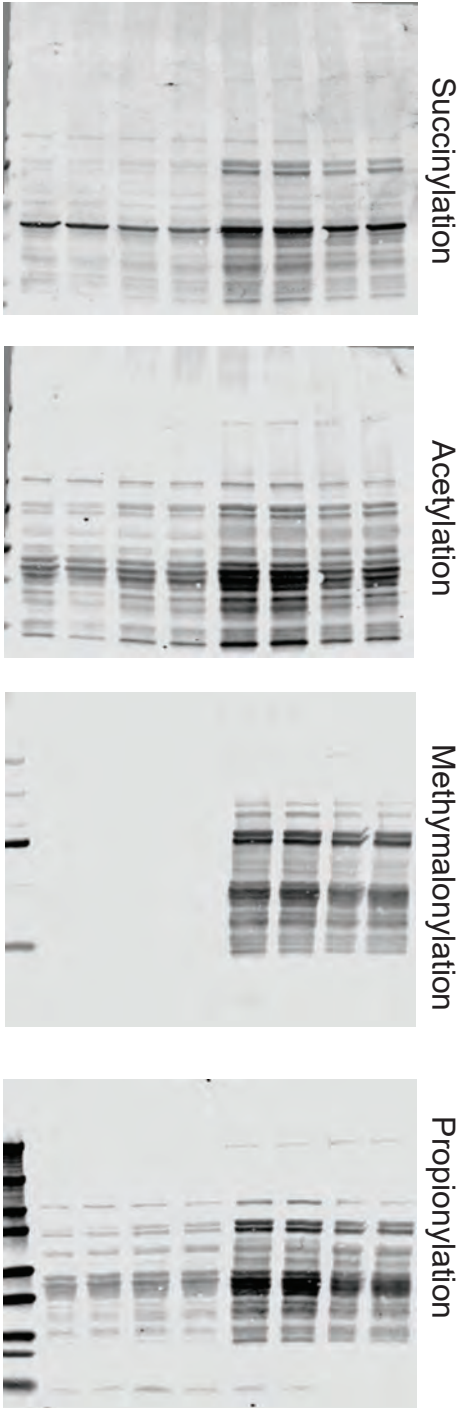

Supplement: jciinsight-9-174097-s147.pdf [file jciinsight-9-174097-s147.pdf]
